# Inference of Gene Regulatory Network Uncovers the Linkage Between Circadian Clock and Crassulacean Acid Metabolism in *Kalanchoë fedtschenkoi*

1 Robert C. Moseley<sup>1</sup>, Francis Motta<sup>2</sup>, Gerald A. Tuskan<sup>3,4</sup>, Steve Haase<sup>1</sup>, Xiaohan Yang<sup>3,4,5\*</sup>

2 <sup>1</sup>Department of Biology, Duke University, Durham, North Carolina, USA

3 <sup>2</sup>Department of Mathematical Sciences, Florida Atlantic University, Boca Raton, Florida, 33431  
4 USA

5 <sup>3</sup>Biosciences Division, Oak Ridge National Laboratory, Oak Ridge, Tennessee, USA

6 <sup>4</sup>DOE Center for Bioenergy Innovation, Oak Ridge National Laboratory, Oak Ridge, Tennessee,  
7 USA

8 <sup>5</sup>The Bredesen Center for Interdisciplinary Research and Graduate Education, University of  
9 Tennessee, Knoxville, TN, USA

10 \* **Correspondence:**

11 Dr. Xiaohan Yang

12 yangx@ornl.gov

## 13 **Abstract**

14 The circadian clock drives time-specific gene expression, allowing for associated  
15 biological processes to be active during certain times of the 24 h day. Crassulacean acid  
16 metabolism (CAM) photosynthetic plants represent an interesting case of circadian regulation of  
17 gene expression as CO<sub>2</sub> fixation and stomatal movement in CAM plants display strong circadian  
18 dynamics. The molecular mechanisms behind how the circadian clock enabled these  
19 physiological differences is not well understood. Therefore, we set out to investigate whether  
20 core circadian elements in CAM plants were re-phased during evolution, or whether networks of  
21 phase-specific genes were simply connected to different core elements. We utilized a new metric  
22 for identifying candidate core genes of a periodic gene network and then applied the Local Edge  
23 Machine (LEM) algorithm to infer regulatory relationships between the candidate core clock  
24 genes and orthologs of known core clock genes in *K. fedtschenkoi*. We also used LEM to identify  
25 stomata-related gene targets for *K. fedtschenkoi* core clock genes and constructed a subsequent  
26 gene regulatory network. Our results provide new insights into the mechanism of circadian  
27 control of CAM-related genes in *K. fedtschenkoi*, facilitating the engineering of CAM machinery  
28 into non-CAM plants for sustainable crop production in water-limited environments.

## 29 **1 Introduction**

30 The circadian clock is a vital time-keeping mechanism that synchronizes periodic  
31 environmental signals to an organism's physiology, allowing for biological processes to function  
32 in a timely manner. This mechanism is very important in plants due to their sessile nature.

This manuscript has been authored by UT-Battelle, LLC under Contract No. DE-AC05-00OR22725 with the U.S. Department of Energy. The United States Government retains and the publisher, by accepting the article for publication, acknowledges that the United States Government retains a non-exclusive, paid-up, irrevocable, worldwide license to publish or reproduce the published form of this manuscript, or allow others to do so, for United States Government purposes. The Department of Energy will provide public access to these results of federally sponsored research in accordance with the DOE Public Access Plan (<http://energy.gov/downloads/doe-public-access-plan>).

33 Numerous environmental signals and stressors to plants are cyclic, such as light availability,  
34 temperature, and predation. The circadian clock thus enables plants to activate the appropriate  
35 processes in response to these repeating variables.

36 Plants that photosynthesize through crassulacean acid metabolism (CAM) are great  
37 examples of how plants synchronize biological processes to their environment. CAM plants  
38 exhibit improved photosynthetic efficiency due to a temporal separation of CO<sub>2</sub> fixation and  
39 improved water-use efficiency due to inverted stomatal conductance, relative to C<sub>3</sub> plants<sup>1</sup>.  
40 These traits coupled with the global issue of increased frequency and intensity of drought<sup>2,3</sup> have  
41 generated an increase in CAM research with the goal of engineering these traits into C<sub>3</sub> plants, to  
42 enable better drought responses and/or improved drought tolerance<sup>4,5</sup>. Currently, it is theorized  
43 that the temporal separation of CO<sub>2</sub> fixation is under control of the circadian clock<sup>6,7</sup> and that the  
44 inverted stomatal conductance could be a result of a change in clock regulation<sup>8</sup>. However, the  
45 events that lead to these drastic physiological differences seen in CAM plants via the circadian  
46 clock is not well understand.

47 To explain potential ways the circadian clock was involved in the evolution of CAM, the  
48 first step is to understand components that make up the circadian clock network. The circadian  
49 clock is a complex network that has at its center a small regulatory network of core clock genes,  
50 generally referred to as the core clock<sup>9</sup>. Core clock genes are defined as highly connected  
51 transcription factors (TFs) which subsequently create positive and negative feedback loops. This  
52 network of interlocking feedback loops causes the core clock genes to be rhythmically expressed.  
53 Connected to the core clock are additional genes, usually TFs, as the core clock TFs regulate not  
54 only themselves but also genes outside the core clock. This transmits the rhythmicity of gene  
55 expression generated by the core clock to additional networks, resulting in these specific  
56 networks to have rhythmically expressed genes. These genes and the networks they are in are  
57 generally referred to as clock-regulated (Fig. 1A). Eventually, the phenotypes connected to these  
58 networks display rhythmicity as well. Using these definitions one can begin to generate testable  
59 hypotheses on how the circadian clock could have been involved in the evolution of CAM.

60 For example, stomatal movement has been shown to be under the control of the circadian  
61 clock<sup>10</sup>, therefore, the inversion of stomatal movement seen in CAM plants, relative to C<sub>3</sub>, could  
62 have occurred from rewiring between the core clock and the gene regulatory network (GRN)  
63 controlling stomatal movement. Specifically, the stomatal movement GRN could be under the  
64 control of another core clock gene in the core clock (Fig. 1B) or the original core clock gene was  
65 rewired within the core clock network (Fig. 1C), altering timing in the stomatal movement GRN.

66 A more intriguing hypothesis is that CAM plants use different genes than C<sub>3</sub> plants in the  
67 core clock network. This isn't to say that the CAM core clock network is constructed differently  
68 or consist of functionally different genes, but rather has conserved network topology and  
69 functionally similar, non-orthologous genes. This hypothesis is based on the idea that network  
70 topology is as equally, if not more important, in GRNs as the network components themselves<sup>11,12</sup>.  
71 The conservation of topology and sequence divergence in components in circadian clock  
72 network across species has been well documented<sup>9,13,14</sup>. This presents the idea that the stomatal  
73 movement GRN in CAM plants could be regulated by unknown core clock genes.

74 To test these hypotheses, construction of gene network models that incorporate the  
75 underlying temporal dynamics is needed. Traditional methods to build models, such as ChiP-  
76 chip, ChiP-seq, and mutant expression profiling, can be laborious and can miss the dynamics of  
77 the network. Fortunately, high-throughput technologies have allowed for tractable methods of  
78 measuring transcription levels in time-course experiments<sup>15-21</sup>. These data exhibit the underlying

79 temporal dynamics of gene expression and new computational tools have taken advantage of this  
80 property to help infer and build gene network models<sup>22,23</sup>.

81 Therefore, we utilized time-course transcriptome data from the CAM plant *Kalanchoë*  
82 *fedtschenkoi*<sup>21</sup> to infer the regulatory relationships between the core clock network and stomatal-  
83 related genes. Through network inference, several genes were identified as potentially new core  
84 clock genes in *K. fedtschenkoi*. Additionally, stomata-related genes, including genes with  
85 rescheduled gene expression, were predicted to be regulated by core clock genes in *K.*  
86 *fedtschenkoi*. The circadian clock plays a crucial role in the physiological response to various  
87 environmental stresses in plants, such as drought<sup>24</sup> and our results provide a circadian clock  
88 network model to experimentally test various hypotheses on circadian control of stomatal  
89 movement in CAM. Fully elucidating the links between the circadian clock and CAM will be  
90 key for successful engineering of CAM into C<sub>3</sub> plants for improved drought response and  
91 tolerance.

## 92 **2 Results**

### 93 **2.1 Candidate core clock transcription factors in *Kalanchoë fedtschenkoi***

94 DLxJTK was used to rank the rhythmic *K. fedtschenkoi* gene list from Moseley, et al.<sup>25</sup>  
95 to pull out potential core clock genes. The top 60 TFs ranked by DLxJTK were selected from the  
96 full list of DLxJTK ranked genes (Supplementary Table S1) and were used as candidate core  
97 clock TFs. The candidate core clock TFs covered a majority of the phases of the day and  
98 displayed a bimodal distribution with peaks occurring before subjective night and before  
99 subjective morning (Supplementary Fig S1). These results are consistent with phase call  
100 distributions of circadian genes seen in other plant species, as well as non-plant species<sup>16,19,26</sup>.  
101 To determine if any of the *K. fedtschenkoi* TFs were orthologous to *A. thaliana* TFs that have  
102 been annotated as circadian-related, ortholog groups (OGs) constructed in Yang, et al.<sup>21</sup> were  
103 investigated. Only 36 of the 60 *K. fedtschenkoi* TFs were placed in OGs with 75 *A. thaliana*  
104 genes. Of the 75 *A. thaliana* genes, 13 were found to be associated with circadian rhythm  
105 (Supplementary Table S2). A majority of the TFs belonged to the C2H2, MYB-HB, and C2C2-  
106 CO families containing 15, 9, and 9 genes, respectively (Supplementary Fig. S1).

107 After applying a cutoff of 0.7 to remove low probability regulatory relationships, all  
108 known core clock TFs were predicted to regulate at least one candidate core clock TF (Fig. 2).  
109 One ortholog of LNK2 (Kaladp0099s0129) was predicted to regulate 20 candidate clock-  
110 regulated TFs while the orthologs of LUX (Kaladp0033s0047) and LNK1 (Kaladp0607s0046)  
111 were predicted to regulate eight different candidate core clock TFs each. All but 6 candidate core  
112 clock TFs were found to be activated or repressed by known core clock TFs, while 13 candidate  
113 core clock TFs were found to activate or repress known core clock TFs. Only one candidate core  
114 clock TF (Kaladp0748s0043) was predicted to regulate more than one known core clock TF (Fig.  
115 2). Using a likelihood ranking cutoff of 0.7, eight candidate core clock TFs were identified as  
116 high-confidence core clock TFs in *K. fedtschenkoi* (Fig. 3A and Supplementary Table S3). The  
117 eight high-confidence candidate core clock TFs were phased to three separate phases of the day  
118 (i.e., morning, midday, evening). To annotate each of the eight high-confidence candidate core  
119 clock TFs, *A. thaliana* orthologs were identified by placement in OGs. All *A. thaliana* orthologs  
120 identified were rhythmic<sup>25</sup>. Descriptions of the genes are below and separated into three  
121 categories corresponding to phase of the day (i.e., morning, midday, evening) of max gene  
122 expression as follows.

## 123 2.2 Morning phased candidate core clock transcription factors

124 Three of the high-confidence candidate core clock TFs (Kaladp0011s1342,  
125 Kaladp0009s0042, and Kaladp1154s0002) in *K. fedtschenkoi* were phased to the morning (Table  
126 1). Among these three, Kaladp0011s1342 and Kaladp0009s0042 were not placed in an OG with  
127 an *A. thaliana* gene. Therefore, their respective protein sequence was used to search the NCBI  
128 non-redundant protein BLAST database using an E-value cutoff of 1e-5. Kaladp0011s1342 was  
129 phased to 2 h before the beginning of the light period and found to have a similar protein  
130 sequence with two *A. thaliana* proteins, AT3G58120 (BZIP61) and AT2G42380 (BZIP34)  
131 (Table 1 and Supplementary Fig. S2). BZIP TFs are known to regulate pathogen defense, light  
132 and stress signaling, seed maturation and flower development<sup>27</sup>. BZIP34 has been predicted to  
133 be involved in the regulation of lipid metabolism and/or cellular transport<sup>28</sup>. BZIP34 and  
134 BZIP61 were both rhythmic and were phased to four and eight h after the beginning of the light  
135 period, respectively (Table 1 and Supplementary Fig. S2). Kaladp0009s0042's protein sequence  
136 lacked homology with any protein sequences in *A. thaliana*. The protein sequence of  
137 Kaladp0009s0042 was found to contain a Dof (DNA-binding with one finger) domain.  
138 Additionally, the remaining *K. fedtschenkoi* gene in this group, Kaladp1154s0002, was found in  
139 an OG containing three *A. thaliana* genes encoding for the Dof domain-containing proteins,  
140 including cycling DOF factor 1 (AT5G62430; CDF1), 2 (AT5G39660; CDF2), and 3  
141 (AT3G47500; CDF3). CDF1, CDF2, and CDF3 are involved in various signaling pathways,  
142 including photoperiodic and light signaling, stress responses and circadian clock regulation<sup>29</sup>.  
143 CDF1 transcription has been reported to be repressed by the circadian clock pseudo-response  
144 regulator protein family<sup>30-34</sup> and activated by the circadian clock genes CCA1 and LHY<sup>35</sup>,  
145 resulting in CDF1 gene expression at dawn. All three *A. thaliana* orthologs were rhythmic and  
146 phased to dawn (Table 1 and Supplementary Fig. S2). CDF1 protein accumulation is also  
147 regulated by the circadian clock through protein stability via complex formation with gigantean  
148 (GI) or flavin-binding, Kelch repeat, F-box 1 (FKF1)<sup>29,36,37</sup>. However, feedback into the clock  
149 has not been reported for the CDFs. Both Kaladp0009s0042 and Kaladp1154s0002 gene  
150 expression peaked at dawn (Table 1 and Supplementary Fig. S2).

## 151 2.3 Midday phased candidate core clock transcription factors

152 Four of the high-confidence candidate core clock TFs (Kaladp0878s0025,  
153 Kaladp0674s0030, Kaladp0748s0043, and Kaladp0674s0182) in *K. fedtschenkoi* were phased to  
154 midday (Table 1 and Supplementary Fig. S2). Kaladp0878s0025 had one *A. thaliana* ortholog  
155 (AT1G07050), which encodes for a Constans-like protein encoding gene and is a predicted target  
156 of the clock regulator GI<sup>38</sup>. The transcript expression of Kaladp0878s0025 was phased to 8 h  
157 after the beginning of the light period, whereas its *A. thaliana* ortholog had gene expression  
158 phased to 12 h after light (Table 1 and Supplementary Fig. S2).

159 Kaladp0674s0030 had two *A. thaliana* orthologs, AT5G63160 and AT3G48360, with  
160 both encoding for members of the Bric-a-Brac/Tramtrack/Broad (BTB) gene family, specifically  
161 BT1 and BT2, respectively. Only BT2 had gene expression data in the Mockler, et al.<sup>39</sup> dataset  
162 and was found to be rhythmic with gene expression phased to 20 h after light. Kaladp0674s0030  
163 was phased to six h after light, displaying a shift in expression between the two species (Table 1  
164 and Supplementary Fig. S2). BT2 is known to activate telomerase expression in mature *A.*  
165 *thaliana* leaves, play a critical role in nitrogen-use efficiency in *A. thaliana* and *Oryza sativa*,



166 suppress sugar and ABA responses, and positively regulate certain auxin responses in plants<sup>40,41</sup>.  
167 Additionally, BT2 is regulated diurnally and controlled by the circadian clock, with maximum  
168 expression in the dark<sup>41</sup>. It has been suggested that the pattern of gene expression for BT2  
169 mRNA could be linked to the availability of photosynthate, which is a product of photosynthesis  
170<sup>40</sup>.

171 Kaladp0748s0043 was found to be orthologous to the *A. thaliana* plant homeobox family  
172 protein BELL1 (BEL1), which is a key regulator of ovule development and needed for auxin and  
173 cytokinin signaling pathways for correct patterning of the ovule<sup>42</sup>. Kaladp0748s0043's gene  
174 expression was phased to 6 h after light, whereas BEL1 in *A. thaliana* was phased to 12 h after  
175 light (Table 1 and Supplementary Fig. S2).

176 Kaladp0674s0182 was orthologous to RING/U-box superfamily proteins in *A. thaliana*,  
177 which are typically E3 ubiquitin ligases. Due to this ambiguity in function, Kaladp0674s0182  
178 will not be used in further analysis.

## 179 **2.4 Evening phased candidate core clock transcription factors**

180 Only one high-confidence candidate core clock TF (Kaladp0007s0017) in *K. fedtschenkoi*  
181 had gene expression phased to the evening (Table 1 and Supplementary Fig. S2).  
182 Kaladp0007s0017 had two *A. thaliana* orthologs, which encode for jasmonate (JA)-associated  
183 MYC2-like proteins 1 (AT2G46510; JAM1) and 2 (AT1G01260; JAM2). JAM1 has been  
184 reported as the balancing component opposite of the MYC2 TF in the JA signaling pathway<sup>43</sup>.  
185 Specifically, JAM1 and MYC2 are induced by JA and share many of the same target genes.  
186 Where MYC2 activates transcription of multiple genes, including JAM1, JAM1 negatively  
187 influences gene expression by physically interfering with MYC2 binding to promoter regions of  
188 target genes<sup>43</sup>. The target genes for both TFs are considered “early-responsive JA genes” as  
189 changes in gene expression of target genes occur within 1 h of JA detection<sup>44</sup>. JA signaling is  
190 linked to activation of defense pathways and has been reported to be under the control of the  
191 circadian clock through regulation of MYC2 via repression of transcription<sup>45</sup>. Additionally,  
192 JAM1 has been reported to participate in ABA signaling as a positive regulator as  
193 overexpression of the gene in *A. thaliana* increased drought tolerance<sup>45</sup>. JAM1 and JAM2 in *A.*  
194 *thaliana* had gene expression phased to 12 and 9 h after light, respectively, whereas  
195 Kaladp0007s0017 had gene expression phased to 14 h after light (Table 1 and Supplementary  
196 Fig. S2).

## 197 **2.5 Core clock regulation of stomata-related genes in *K. fedtschenkoi***

198 The fact that stomatal movement has been inverted in CAM plants raises the question  
199 whether the circadian clock, specifically core clock TFs, played a role in this inversion through  
200 rescheduling of gene expression. To investigate this question, regulatory relationships were  
201 inferred between the 7 high-confidence candidates, plus the known core clock TFs in *K.*  
202 *fedtschenkoi* (Supplementary Table S4), and the 1,605 stomata-related genes in *K. fedtschenkoi*,  
203 which were identified as rhythmic in a separate study<sup>25</sup>. Four high-confidence candidate core  
204 clock TFs in *K. fedtschenkoi*, Kaladp0007s0017, Kaladp1154s0002, Kaladp0674s0030, and  
205 Kaladp0878s0025, were found in the target list (Supplementary Table S1 of Moseley, et al.<sup>8</sup>) of  
206 rhythmic stomata-related genes and were subsequently removed as targets.

207 LEM was used to infer regulatory relationships between core clock TFs and rhythmic  
208 stomata-related genes. Using a cutoff of 0.7 on the LEM output related to the probability of a TF  
209 regulating a gene, 582 of the 1,605 stomata-related genes were inferred to be regulated by core  
210 clock TFs (Supplementary Table S4 and S5). A visualization of the overall network can be seen  
211 in Figure 4. Core clock genes are known to activate or repress genes, depending on their mode of  
212 regulation, during specific phases of the day. For instance, CCA1 and LHY repress genes that are  
213 expressed during the evening<sup>46</sup>. To determine if LEM predicts the appropriate phase of  
214 regulation for core clock genes, the phase calls of target genes for core clock TFs with  $\geq 10$  target  
215 genes were examined in diel plots (Fig. 4 and 5a). LNK1 and LNK2 are thought to activate gene  
216 expression of targets during the afternoon and evening<sup>46</sup>, and in line with this, a majority of the  
217 predicted stomata-related gene targets for both LNK genes in *K. fedtschenkoi* were phased to the  
218 afternoon and evening (Fig. 5a). PRR7 is known to repress genes during dawn and in the  
219 morning<sup>46</sup>. Indeed, predicted target genes of PRR7 in *K. fedtschenkoi* were phased to dawn and  
220 the morning (Fig. 5a). Lastly, ELF4 is known to repress genes in the morning and evening by  
221 forming a complex with ELF3 and LUX<sup>47</sup>. In *K. fedtschenkoi* LEM only predicted morning-  
222 phased gene targets for ELF4 in *K. fedtschenkoi* (Fig. 5a). The remaining components of the  
223 evening complex were examined as well to see if any of their targets were phased to the evening.  
224 None of the remaining evening complex components, including the two other ELF4 genes, had  
225 target genes phased to the evening (Supplementary Table S6). Additionally, ELF4, ELF3, and  
226 LUX did not share similar targets.

227 Candidate core clock TFs were allowed in the LEM model to be activators or repressors.  
228 Most TFs were inferred to be both activators or repressors, so it is unclear whether they are  
229 acting as one or the other (Supplementary Table S5). However, high-confidence candidate clock  
230 TFs Kaladp0007s0017 and Kaladp9878s0025 were primarily predicted as activators of gene  
231 expression and candidate core clock TF Kaladp1154s0002 was predicted primarily as a repressor  
232 of gene expression (Supplementary Table S5). A majority of the targets for all high-confidence  
233 candidate core clock TFs were phased to either dusk or dawn (Fig. 5b).

234 To determine what biological functions in stomata-related processes are under the control  
235 of the circadian clock, enrichment of associated gene ontology terms was performed. A majority  
236 of the biological functions enriched in the 582 rhythmic stomata-related genes were associated to  
237 protein phosphorylation (Fig. 6). To determine if any *K. fedtschenkoi* genes are related to *A.*  
238 *thaliana* genes annotated or known as stomata-related, OGs were examined again. Within the  
239 582 *K. fedtschenkoi* genes, 49 were placed in OGs that contained *A. thaliana* genes that were  
240 either annotated or known as stomata-related genes (Supplementary Table S5). All the candidate  
241 core clock TFs and four known core clock TFs were predicted to regulate at least one of the 49  
242 *K. fedtschenkoi* genes. The remaining stomata-related genes were identified in a separate study<sup>8</sup>  
243 as new stomata-related genes and all known and candidate core clock TFs were predicted to  
244 regulate at least one new stomata-related gene (Supplementary Table S5).

## 245 2.6 Regulation of rescheduled stomata-related genes

246 Five stomata-related *K. fedtschenkoi* genes identified in Yang, et al.<sup>21</sup> as having  
247 undergone rescheduling of gene expression relative to their C<sub>3</sub> orthologs were inferred to be  
248 regulated by core clock TFs, with only one of them being orthologous to a known stomata-  
249 related gene in *A. thaliana* (Table 2). Twelve stomata-related *K. fedtschenkoi* genes identified in  
250 Moseley, et al.<sup>8</sup> as having undergone rescheduling of gene expression relative to their C<sub>3</sub>

251 orthologs were inferred to be clock-regulated, with only three being orthologous to annotated or  
252 known stomata-related genes in *A. thaliana* (Table 2). Several of these genes were predicted to  
253 encode for protein kinases and transporters. High-confidence candidate core clock TF  
254 Kaladp0011s1342 was predicted to regulate the most stomata-related genes that displayed re-  
255 scheduling (Table 2). Interestingly, Kaladp0011s1342 also displayed rescheduling of gene  
256 expression relative to its two orthologs in *A. thaliana* (Supplementary Fig. S2) and one of the  
257 targets of Kaladp0011s1342 was the rescheduled catalase 2 gene identified in Moseley, et al. <sup>8</sup>.

### 258 3 Discussion

259 Through a combination of a new metric to identify potential core clock genes and the  
260 gene regulation inference algorithm, LEM, this study predicted several novel candidate core  
261 clock TFs in *K. fedtschenkoi*. These seven core clock gene candidates predicted in *K.*  
262 *fedtschenkoi* are located in the transcriptional feedback loops (Fig. 3B), which are consistent  
263 with the feedback-loop architecture of the core clock <sup>46</sup>. *A. thaliana* orthologs of several *K.*  
264 *fedtschenkoi* candidate core clock TFs were found to have been reported to be connected to the  
265 circadian clock and are involved in various signaling pathways. Additionally, most of the  
266 candidate core clock TFs were either phased to the morning or evening (Table 1), consistent with  
267 other reported circadian genes <sup>16,19</sup>. The discovery of these new potential core clock candidates  
268 supports our previous hypothesis that there could be unknown circadian genes in *K. fedtschenkoi*  
269 <sup>21</sup>. Recently, LEM was used to identify new core circadian clock genes in mouse <sup>22</sup>, in which  
270 four out of the top ten genes were validated as clock-regulated genes via RNAi knockdown  
271 approach. The success of this application of LEM in mouse makes the candidate core clock TFs  
272 identified here in *K. fedtschenkoi* high-confidence candidates for future experimental work.

273 Figure 1 illustrates two models explaining how the circadian clock could alter gene  
274 expression and therefore physiology of an organism. The first model (Fig. 1B) illustrates that a  
275 different core clock gene could have taken over the regulation of a physiological process, thus  
276 changing when the process occurs. The second model (Fig. 1C) illustrates that a change in the  
277 timing of a physiological process could be a result of the core clock gene, that regulates the  
278 process, being rewired in the core clock network. Evidence for both models explaining how  
279 stomatal movement was inverted in CAM plants by the circadian clock was found, suggesting  
280 that both mechanisms could have aided in the evolution of CAM. For instance, ELF4 was found  
281 to have rescheduled expression relative to its *A. thaliana* ortholog <sup>25</sup> and in the current study,  
282 ELF4 was predicted to regulate a rescheduled stomata-related gene (Table 2), in line with the  
283 second model (Fig. 1C).

284 It has been suggested that there could be new core clock genes in *K. fedtschenkoi* <sup>21</sup> and  
285 in this study, several TFs were predicted with high-confidence to be new core clock genes in *K.*  
286 *fedtschenkoi* (Table 1 and Fig. 4). This presented a new model by which the circadian clock  
287 could have altered stomatal movement in CAM plants via the new core clock genes regulating  
288 stomatal-related genes. Several rescheduled stomatal-related genes were inferred to be regulated  
289 by the predicted core clock genes (Table 2), supporting the model of new core clock genes  
290 regulating stomatal movement. For example, a duplicated CAT2 gene in *K. fedtschenkoi* was  
291 found to have rescheduled gene expression and proposed to be involved in the inversion of  
292 stomatal movement in *K. fedtschenkoi* <sup>8</sup>. The rescheduled CAT2 gene was inferred to be  
293 regulated by the predicted core clock gene Kaladp0011s1342. Evidence supporting this model  
294 and the two models illustrated in Figure 1 suggest that the core clock played a role in reversing

295 the day/night stomatal movement pattern in CAM photosynthesis species in comparison with C<sub>3</sub>  
296 photosynthesis species through a combination of the three mechanisms.

297 The candidate core clock TFs identified in this study may be used by the core clock  
298 network to integrate rhythmicity into the various signaling pathways they control or, they may be  
299 diurnally regulated genes which functionally affect the core clock. Given the experimental  
300 conditions, we cannot say these are not diurnally regulated genes, and thus they may represent  
301 clock regulatory elements that alter the transcript dynamics of known core clock genes by  
302 integrating external light stimuli. Experimental work is needed to determine their essentiality  
303 with the core clock. For instance, protoplast transient reporter gene expression assay<sup>48</sup> can be  
304 used to validate the role of these TFs in the regulation of circadian rhythm. Specially, promoter  
305 fusion constructs can be used that contain the promoter of the candidate core clock TF driving  
306 the transcription of a fluorescent protein. Transfection of protoplasts and subsequent recording of  
307 fluorescence over 48 hours would enable a quick means to determine involvement with the  
308 clock. A *K. fedtschenkoi* protoplast protocol has not been published, though an *A. thaliana*  
309 protoplast assay may work based on the concept of core clock genes being highly connected. An  
310 additional study could examine the impact of the candidate core clock TF on the core clock  
311 network. Here, a two-promoter construct would be made with one promoter being a constitutive  
312 promoter driving the transcription of the respective candidate TF and the second promoter being  
313 the promoter of a known core clock gene that the candidate TF is predicted to target. The known  
314 core clock promoter would then drive the transcription of a fluorescent protein. If the candidate  
315 core clock TF is integrated into the core clock network, expression of the fluorescent protein will  
316 be altered relative to the expression of the core clock gene associated with the core clock  
317 promoter driving the fluorescent protein.

318 Within the clock-regulated stomata-related genes, several GO terms associated with  
319 phosphorylation were significantly enriched (Fig. 6). Additionally, several rescheduled stomata-  
320 related genes were identified as protein kinases (Table 2). Phosphorylation allows for rapid  
321 regulation of protein function and is known to play a significant role in stomatal movement.  
322 Furthermore, an extensive array of phosphorylation and dephosphorylation events occur in guard  
323 cells<sup>49</sup>. Signaling pathways for stomatal closure, e.g., ABA, and for stomatal opening, e.g., blue  
324 light, both involve protein kinases phosphorylating anion channels (ABA signaling:<sup>50-53</sup>) and  
325 H<sup>+</sup>-ATPases (blue light signaling:<sup>54-56</sup>). Evidence of gene expression rewiring of protein kinases  
326 involved in stomatal movement has also been identified in the CAM plant *Agave americana*<sup>15</sup>.  
327 Taken together, these results suggest that the clock played a role in the inversion of stomatal  
328 movement, potentially by rescheduling phosphorylation events of stomata-related genes. The  
329 direct substrates of these kinases and how they affect stomatal movement remains unknown.  
330 However, the channels and ATPase identified in Table 2 serve as good candidates to test as  
331 substrates for the protein kinases identified here.

332 Through gene regulatory network analysis, this study predicted a set of novel TFs that  
333 could be important components of either the core clock or the networks attached to the core  
334 clock in the CAM species *K. fedtschenkoi*. These candidate core clock TFs, if validated by  
335 experiments in the future, would significantly advance our understanding of the regulatory  
336 mechanism in CAM systems. Also, our analysis of the regulatory relationship between the novel  
337 TFs and stomata-related genes revealed that clock-facilitated rescheduling of protein kinases  
338 involved in stomatal movement aided the inverted stomatal movement seen in CAM plants, via  
339 connecting with different core clock TFs. These results provide new knowledge to inform



340 genetic improvement of drought resistance in C<sub>3</sub> photosynthesis plants for sustainable food and  
341 bioenergy production on dry and marginal lands.

## 342 **4 Materials and Methods**

### 343 **4.1 Time-course gene expression data**

344 The diel expression data for *K. fedtschenkoi* and *Arabidopsis thaliana* were obtained  
345 from Yang, et al.<sup>21</sup> and Mockler, et al.<sup>39</sup>, respectively. The *A. thaliana* dataset obtained from  
346 Mockler, et al.<sup>39</sup> was the photo/thermocycle dataset. The *K. fedtschenkoi* expression data were  
347 collected at 2, 4, 6, 8, 10, 12, 14, 16, 18, 20, 22, and 24 h whereas the *A. thaliana* data were  
348 collected at 4, 8, 12, 16, 20, and 24 h after the starting of the light period. Since the *A. thaliana*  
349 gene expression data was measured at 4-h intervals and the *K. fedtschenkoi* data was measured at  
350 2-h intervals, the *A. thaliana* data was adjusted to arrive at expression profiles for all *A. thaliana*  
351 and *K. fedtschenkoi* genes on the same time scale. Here, the piecewise cubic Hermite  
352 interpolating polynomial (pchip) interpolation function in the pandas Python library was used to  
353 sample the *A. thaliana* data to simulate gene expression levels at additional time points so that  
354 both time-course data sets consisted of the same time intervals: 2, 4, 6, 8, 10, 12, 14, 16, 18, 20,  
355 22, and 24 h after the starting of the light period. Pchip was preferred over the more common  
356 method of cubic spline interpolation due to cubic spline's tendency to overshoot which  
357 introduces oscillations. Additionally, pchip maintains the shape of the data and has been used on  
358 microarray time course data sets<sup>57,58</sup>. Additionally, *K. fedtschenkoi* genes with a max FPKM<1  
359 were considered noise and removed. The rhythmic *K. fedtschenkoi* and *A. thaliana* gene sets  
360 were taken from<sup>25</sup>.

### 361 **4.2 Identifying candidate core clock genes**

362 Identifying core clock genes using time-course data can be difficult due to similarities in  
363 their gene expression profiles with the gene expression profiles of clock-regulated genes.  
364 However, core clock genes in various species have been found to have the highest amplitudes  
365 and the most statistically significant rhythms<sup>22,59,60</sup>. The periodicity detection methods of de  
366 Lichtenberg (DL)<sup>61</sup> and JTK-CYCLE (JTK)<sup>62</sup> are assays that take into account the amplitude of  
367 time-course gene expression and if the period of expression matches to the period length in  
368 question, respectively. Therefore, to better identify core clock genes, a new metric was  
369 established, termed DLxJTK, that combines these two features of DL and JTK (S. Haase and F.  
370 Motta, personal communication). DLxJTK uses the p-values for amplitude from DL and for  
371 periodicity from JTK for each gene and has been used in mammalian and fungal systems with  
372 success (S. Haase and F. Motta, personal communication). The DLxJTK formula is:  
373

$$DLxJTK = P_{per} P_{amp} \left( \left( 1 + \frac{P_{per}}{0.001} \right)^2 \right) \left( \left( 1 + \frac{P_{amp}}{0.001} \right)^2 \right)$$

374 where  $P_{per}$  is the JTK p-value for periodicity and  $P_{amp}$  is the DL p-value for amplitude. The  
375 output of DLxJTK is a ranked ordered list of genes, with core clock genes being near the top of  
376 the list. DLxJTK was applied to the *K. fedtschenkoi* rhythmic gene list from Moseley, et al.<sup>25</sup>  
377 and the top 60 TFs were used for further analysis.  
378

379 Previously, a method, Local Edge Machine (LEM), was described that enabled the  
380 discovery of new components of the mouse circadian clock network<sup>22</sup>. To identify high-  
381 confidence core clock genes in *K. fedtschenkoi*, LEM was used to infer regulatory relationships  
382 between the top 60 candidate core clock TFs and TFs orthologous to known core clock genes in  
383 *A. thaliana* (from here on referred to as “known core clock TFs”) in two steps. Firstly, LEM was  
384 used to identify if any of the 60 candidate core clock TFs were regulated by the known core  
385 clock TFs. The known core clock transcriptional activators used were reveille 8 (RVE8), RVE6,  
386 light-regulated WD 1 (LWD1), LWD2, night light-inducible and clock-regulated 1 (LNK1), and  
387 LNK2<sup>46</sup>. The known core clock transcriptional repressors used were circadian clock associated 1  
388 (CCA1), late elongated hypocotyl (LHY), timing of cab expression 1 (TOC1), CCA1 hiking  
389 expedition (CHE), LUX, NOX, pseudo-response regulator 9 (PRR9), PRR7, PRR5, ELF3, and  
390 ELF4<sup>46</sup>. LUX is only active after forming the evening complex with early flowering 3 (ELF3)  
391 and 4 (ELF4)<sup>47,63</sup>, which do not bind to DNA<sup>64</sup>. ELF3 and ELF4 were included for this reason.  
392 LEM was set to only use the respective mode of gene regulation for each known core clock TF  
393 used. All candidate core clock TFs were set as targets for the known core clock TFs.

394 Secondly, since core clock TFs are known to regulate other known core clock genes,  
395 LEM was run again but with the top 60 candidate core clock TFs as potential regulators of the  
396 known core clock TFs. To identify high-confidence candidate core clock TFs, a measure of  
397 likelihood, described in McGoff, et al.<sup>22</sup>, was used for each candidate core clock TF. This  
398 measure is calculated by taking the maximum LEM probability that the candidate core clock TF  
399 was a regulator of any known core clock TF and multiplying it by the maximum LEM  
400 probability that the candidate core clock TF was regulated by any known core clock TF.

### 401 **4.3 Identify core clock-regulators of stomata-related genes**

402 LEM was applied to identify potential regulatory relationships between core clock TFs  
403 and stomata-related genes. Known core clock TFs plus the candidate core clock TFs were used  
404 as potential regulators of stomata-related genes. Stomata-related genes in *K. fedtschenkoi* were  
405 identified as genes that are orthologous to an *A. thaliana* gene that is either annotated as stomata-  
406 related or is known as stomata-related. Orthology between species was based on placement  
407 within the same ortholog group. Additionally, new *K. fedtschenkoi* stomata-related genes  
408 predicted in Moseley, et al.<sup>8</sup> were included as well.

### 409 **4.4 Gene Ontology analysis**

410 Gene Ontology (GO) terms for the *K. fedtschenkoi* and *A. thaliana* were obtained from  
411 Phytozome v12.1<sup>65</sup>. *K. fedtschenkoi* genes encoding putative transcription factors were retrieved  
412 from<sup>21</sup>. Using ClueGO<sup>66</sup>, observed GO biological process were subjected to the right-sided  
413 hypergeometric enrichment test at medium network specificity selection and p-value correction  
414 was performed using the Holm-Bonferroni step-down method<sup>67</sup>. There was a minimum of 3 and  
415 a maximum of 8 selected GO tree levels, while each cluster was set to include a minimum of  
416 between 3% and 4% of genes associated with each term. GO term fusion and grouping settings  
417 were selected to minimize GO term redundancy and the term enriched at the highest level of  
418 significance was used as the representative term for each functional cluster. The GO terms with  
419 p-values less than or equal to 0.05 were considered significantly enriched.

## 420 **4.5 Comparative analysis of gene expression**

421 To calculate time-delay between time-course gene expression profiles, the diel expression  
422 data were normalized by Z-score transformation. Pair-wise circular cross correlation was  
423 calculated for the orthologous gene pairs of interest for all possible time delays using the SciPy  
424 library (<https://www.scipy.org/>) in Python. Circular cross correlation produces a correlation  
425 coefficient between two genes (e.g., gene 1 and gene 2) as a function of the lag. With each  
426 correlation coefficient, a lag value was given. The lag values were then converted into hours,  
427 giving an estimate on time delay. The time delay at which the correlation was maximum was  
428 selected as the estimated delay between the two genes. Spearman's rank correlation coefficient  
429 was then calculated between gene 1's expression data and the shifted expression data of gene 2  
430 by its estimated time delay.

## 431 **4.6 Data Availability**

432 All datasets generated for this study are included in the manuscript and the supplementary  
433 files.

## 434 **5 Author Contributions**

435 RCM and XY conceived the research. RCM performed all data analyses and wrote the  
436 manuscript. FM, SH, GAT and XY provide input during the study and edited the manuscript.

## 437 **6 Competing Interest**

438 The author(s) declare no competing interests.

## 439 **7 Funding**

440 This manuscript has been authored by UT-Battelle, LLC under Contract No. DE-AC05-  
441 00OR22725 with the U.S. Department of Energy. This research was supported by the U.S.  
442 Department of Energy, Office of Science, Genomic Science Program under Award Number DE-  
443 SC0008834 and the DOE Center for Bioenergy Innovation. Oak Ridge National Laboratory is  
444 managed by UT-Battelle, LLC for the U.S. Department of Energy under Contract Number DE-  
445 AC05-00OR22725.

## 446 **8 Acknowledgements**

447 The authors wish to thank David Weston, Margaret E. Staton, and Jay Chen for critical  
448 comments on the manuscript.

## 449 **9 References**

450 1 Ehleringer, J. R. & Monson, R. K. Evolutionary and Ecological Aspects of  
451 Photosynthetic Pathway Variation. *Annu. Rev. Ecol. Syst.* **24** (1993).

- 452 2 Cook, B., Smerdon, J. E., Seager, R. & Coats, S. Global warming and 21st century  
453 drying. *Climate Dynamics* **43**, 2607-2627 (2014).
- 454 3 Dai, A. Increasing drought under global warming in observations and models. *Nature*  
455 *Climate Change* **3**, 52-58, doi:10.1038/nclimate1633 (2012).
- 456 4 Borland, A. M. *et al.* Engineering crassulacean acid metabolism to improve water-use  
457 efficiency. *Trends Plant Sci* **19**, 327-338, doi:10.1016/j.tplants.2014.01.006 (2014).
- 458 5 Yang, X. *et al.* A roadmap for research on crassulacean acid metabolism (CAM) to  
459 enhance sustainable food and bioenergy production in a hotter, drier world. *New*  
460 *Phytologist* **207**, 491-504 (2015).
- 461 6 Hartwell, J. The co-ordination of central plant metabolism by the circadian clock.  
462 *Mechanistic and Functional Studies of Proteins* **33**, 945-948 (2005).
- 463 7 Hartwell, J. The circadian clock in CAM plants. *Endogenous Plant Rhythms*, 211-236  
464 (2006).
- 465 8 Moseley, R. C., Tuskan, G. A. & Yang, X. Comparative Genomics Analysis Provides  
466 New Insight Into Molecular Basis of Stomatal Movement in *Kalanchoë fedtschenkoi*.  
467 *Frontiers in Plant Science* **10**, doi:10.3389/fpls.2019.00292 (2019).
- 468 9 Harmer, S. L. The circadian system in higher plants. *Annu Rev Plant Biol* **60**, 357-377,  
469 doi:10.1146/annurev.arplant.043008.092054 (2009).
- 470 10 Hubbard, K. E. & Webb, A. A. in *Rhythms in Plants: Dynamics Responses in a Dynamic*  
471 *Environment* (eds S. Mancuso & S. Shabala) 231-255 (Springer, 2016).
- 472 11 Kholodenko, B. Cell Signalling Dynamics in Time and Space. *Nat Rev Mol Cell Biol* **7**,  
473 165-176 (2006).
- 474 12 Tiana, G., Krishna, S., Pigolotti, S., Jensen, M. H. & Sneppen, K. Oscillations and  
475 temporal signalling in cells. *Phys Biol* **4**, R1-17, doi:10.1088/1478-3975/4/2/R01 (2007).
- 476 13 McClung, C. R. Plant Circadian Rhythms. *The Plant Cell* **18**, 792-803 (2006).
- 477 14 Young, M. & Kay, S. A. Time Zones: A Comparative Genetics of Circadian Clocks.  
478 *Nature Reviews: Genetics* **2**, 702-715 (2001).
- 479 15 Abraham, P. E. *et al.* Transcript, protein and metabolite temporal dynamics in the CAM  
480 plant Agave. *Nat Plants* **2**, 16178, doi:10.1038/nplants.2016.178 (2016).
- 481 16 Filichkin, S. A. *et al.* Global profiling of rice and poplar transcriptomes highlights key  
482 conserved circadian-controlled pathways and cis-regulatory modules. *PLoS One* **6**,  
483 e16907, doi:10.1371/journal.pone.0016907 (2011).
- 484 17 Higashi, T. *et al.* Detection of Diurnal Variation of Tomato Transcriptome through the  
485 Molecular Timetable Method in a Sunlight-Type Plant Factory. *Front Plant Sci* **7**, 87,  
486 doi:10.3389/fpls.2016.00087 (2016).
- 487 18 Koda, S. *et al.* Diurnal Transcriptome and Gene Network Represented through Sparse  
488 Modeling in *Brachypodium distachyon*. *Front Plant Sci* **8**, 2055,  
489 doi:10.3389/fpls.2017.02055 (2017).



- 490 19 Michael, T. P. *et al.* Network discovery pipeline elucidates conserved time-of-day-  
491 specific cis-regulatory modules. *PLoS Genet* **4**, e14, doi:10.1371/journal.pgen.0040014  
492 (2008).
- 493 20 Ming, R. *et al.* The pineapple genome and the evolution of CAM photosynthesis. *Nat*  
494 *Genet* **47**, 1435-1442, doi:10.1038/ng.3435 (2015).
- 495 21 Yang, X. *et al.* The Kalanchoe genome provides insights into convergent evolution and  
496 building blocks of crassulacean acid metabolism. *Nature Communications* **8**, 1-15,  
497 doi:10.1038/s41467-017-01491-7 (2017).
- 498 22 McGoff, K. A. *et al.* The Local Edge Machine: inference of dynamic models of gene  
499 regulation. *Genome Biol* **17**, 214, doi:10.1186/s13059-016-1076-z (2016).
- 500 23 Cummins, B., Gedeon, T., Harker, S. & Mischaikow, K. in *Computational Methods in*  
501 *Systems Biology*. (eds J. Feret & H. Koeppel) 300-308 (Springer).
- 502 24 Grundy, J., Stoker, C. & Carre, I. A. Circadian regulation of abiotic stress tolerance in  
503 plants. *Front Plant Sci* **6**, 648, doi:10.3389/fpls.2015.00648 (2015).
- 504 25 Moseley, R. C. *et al.* Conservation and Diversification of Circadian Rhythmicity  
505 Between a Model Crassulacean Acid Metabolism Plant *Kalanchoe fedtschenkoi* and a  
506 Model C3 Photosynthesis Plant *Arabidopsis thaliana*. *Front Plant Sci* **9**, 1757,  
507 doi:10.3389/fpls.2018.01757 (2018).
- 508 26 Zhang, R., Lahens, N., Ballance, H., Hughes, M. E. & Hogenesch, J. B. A circadian gene  
509 expression atlas in mammals: Implications for biology and medicine. *PNAS* **111**, 16219-  
510 16224 (2014).
- 511 27 Jakoby, M. *et al.* bZIP transcription factors in Arabidopsis. *Trends in Plant Science* **7**,  
512 106-111 (2001).
- 513 28 Gibalova, A. *et al.* AtbZIP34 is required for Arabidopsis pollen wall patterning and the  
514 control of several metabolic pathways in developing pollen. *Plant Molecular Biology* **70**,  
515 581-601 (2009).
- 516 29 Fornara, F. *et al.* Arabidopsis DOF transcription factors act redundantly to reduce  
517 CONSTANS expression and are essential for a photoperiodic flowering response.  
518 *Developmental Cell* **17**, 75-86 (2009).
- 519 30 Huang, W. *et al.* Mapping the core of the Arabidopsis circadian clock defines the  
520 network structure of the oscillator. *Science* **336**, 75-79 (2012).
- 521 31 Ito, S. *et al.* Insight into missing genetic links between two evening-expressed pseudo-  
522 response regulator genes TOC1 and PRR5 in the circadian clock-controlled circuitry in  
523 *Arabidopsis thaliana*. *Plant Cell Physiol* **49**, 201-213 (2008).
- 524 32 Nakamichi, N. *et al.* Transcriptional repressor PRR5 directly regulates clock-output  
525 pathways. *PNAS* **109**, 17123-17128 (2012).
- 526 33 Nakamichi, N. *et al.* Arabidopsis clock-associated pseudo-response regulators PRR9,  
527 PRR7 and PRR5 coordinately and positively regulate flowering time through the  
528 canonical CONSTANS-dependent photoperiodic pathway. *Plant Cell Physiology* **48**,  
529 822-832 (2007).

- 530 34 Niwa, T. *et al.* Genetic linkages of the circadian-clock associated genes, TOC1, CCA1  
531 and LHY, in the photoperiodic control of flowering time in *Arabidopsis thaliana*. *Plant*  
532 *Cell Physiol* **48**, 925-937 (2007).
- 533 35 Seaton, D. D. *et al.* Linked circadian outputs control elongation growth and flowering in  
534 response to photoperiod and temperature. *Mol Syst Biol* **11**, 776,  
535 doi:10.15252/msb.20145766 (2015).
- 536 36 Imaizumi, T., Schultz, T., Harmon, F., Ho, L. & Kay, S. FKF1 F-box protein mediates  
537 cyclic degradation of a repressor of CONSTANS in *Arabidopsis*. *Science* **309**, 293-297  
538 (2005).
- 539 37 Song, Y. H., Smith, R. W., To, B. J., Millar, A. J. & Imaizumi, T. FKF1 conveys timing  
540 information for CONSTANS stabilization in photoperiodic flowering. *Science* **336**, 1045-  
541 1049, doi:10.1126/science.1219644 (2012).
- 542 38 Keurentjes, J. *et al.* Regulatory network construction in *Arabidopsis* by using genome-  
543 wide gene expression quantitative trait loci. *PNAS* **104**, 1708-1713 (2007).
- 544 39 Mockler, T. C. *et al.* The Diurnal Project: Diurnal and Circadian Expression Profiling,  
545 Model-based Pattern Matching, and Promoter Analysis. *Cold Spring Harbor Symposia on*  
546 *Quantitative Biology* **72**, 353-363 (2007).
- 547 40 Araus, V. *et al.* Members of BTB Gene Family of Scaffold Proteins Suppress Nitrate  
548 Uptake and Nitrogen Use Efficiency. *Plant Physiol* **171**, 1523-1532,  
549 doi:10.1104/pp.15.01731 (2016).
- 550 41 Mandadi, K. K., Misra, A., Ren, S. & McKnight, T. D. BT2, a BTB protein, mediates  
551 multiple responses to nutrients, stresses, and hormones in *Arabidopsis*. *Plant Physiol* **150**,  
552 1930-1939, doi:10.1104/pp.109.139220 (2009).
- 553 42 Bencivenga, S., Simonini, S., Benkova, E. & Colombo, L. The transcription factors BEL1  
554 and SPL are required for cytokinin and auxin signaling during ovule development in  
555 *Arabidopsis*. *Plant Cell* **24**, 2886-2897, doi:10.1105/tpc.112.100164 (2012).
- 556 43 Fonseca, S. *et al.* bHLH003, bHLH013 and bHLH017 are new targets of JAZ repressors  
557 negatively regulating JA responses. *PLoS One* **9**, e86182,  
558 doi:10.1371/journal.pone.0086182 (2014).
- 559 44 Nakata, M. *et al.* A bHLH-type transcription factor, ABA-INDUCIBLE BHLH-TYPE  
560 TRANSCRIPTION FACTOR/JA-ASSOCIATED MYC2-LIKE1, acts as a repressor to  
561 negatively regulate jasmonate signaling in *Arabidopsis*. *Plant Cell* **25**, 1641-1656,  
562 doi:10.1105/tpc.113.111112 (2013).
- 563 45 Li, H., Sun, J., Xu, Y., Jiang, H. & Li, C. The bHLH-type transcription factor AtAIB  
564 positively regulates ABA response in *Arabidopsis*. *Plant Molecular Biology* **65**, 655-665  
565 (2007).
- 566 46 Nohales, M. A. & Kay, S. A. Molecular mechanisms at the core of the plant circadian  
567 oscillator. *Nat Struct Mol Biol* **23**, 1061-1069, doi:10.1038/nsmb.3327 (2016).
- 568 47 Nusinow, D. A. *et al.* The ELF4-ELF3-LUX complex links the circadian clock to diurnal  
569 control of hypocotyl growth. *Nature* **475**, 398-402, doi:10.1038/nature10182 (2011).

- 570 48 Hansen, L. L. & van Ooijen, G. Rapid Analysis of Circadian Phenotypes in Arabidopsis  
571 Protoplasts Transfected with a Luminescent Clock Reporter. *J Vis Exp*,  
572 doi:10.3791/54586 (2016).
- 573 49 Wang, R. *et al.* Common and unique elements of the ABA-regulated transcriptome of  
574 Arabidopsis guard cells. *BMC Genomics* **12** (2011).
- 575 50 Grondin, A. *et al.* Aquaporins Contribute to ABA-Triggered Stomatal Closure through  
576 OST1-Mediated Phosphorylation. *Plant Cell* **27**, 1945-1954, doi:10.1105/tpc.15.00421  
577 (2015).
- 578 51 Mustilli, A. C. Arabidopsis OST1 Protein Kinase Mediates the Regulation of Stomatal  
579 Aperture by Abscisic Acid and Acts Upstream of Reactive Oxygen Species Production.  
580 *The Plant Cell Online* **14**, 3089-3099, doi:10.1105/tpc.007906 (2002).
- 581 52 Sirichandra, C. *et al.* Phosphorylation of the Arabidopsis AtrbohF NADPH oxidase by  
582 OST1 protein kinase. *FEBS Lett* **583**, 2982-2986, doi:10.1016/j.febslet.2009.08.033  
583 (2009).
- 584 53 Vahisalu, T. *et al.* SLAC1 is required for plant guard cell S-type anion channel function  
585 in stomatal signalling. *Nature* **452**, 487-491, doi:10.1038/nature06608 (2008).
- 586 54 Kinoshita, T. & Shimazaki, K. Blue light activates the plasma membrane H<sup>+</sup>-ATPase by  
587 phosphorylation of the C-terminus in stomatal guard cells. *The EMBO Journal* **18**, 5548-  
588 5558 (1999).
- 589 55 Inoue, S. *et al.* Blue light-induced autophosphorylation of phototropin is a primary step  
590 for signaling. *PNAS* **105**, 5626-5631 (2008).
- 591 56 Wang, Y. *et al.* Overexpression of plasma membrane H<sup>+</sup>-ATPase in guard cells promotes  
592 light-induced stomatal opening and enhances plant growth. *Proc Natl Acad Sci U S A*  
593 **111**, 533-538, doi:10.1073/pnas.1305438111 (2014).
- 594 57 Dong, B. *et al.* Predicting Housekeeping Genes Based on Fourier Analysis. *PloS ONE* **6**,  
595 1-11, doi:10.1371/  
596 10.1371/journal.pone.0021012.g001 (2011).
- 597 58 Luo, Z., Azencott, R. & Zhao, Y. Modeling miRNA-mRNA interactions: fitting chemical  
598 kinetics equations to microarray data. *BMC Systems Biology* **9**, 1-15 (2014).
- 599 59 Anafi, R. C. *et al.* Machine learning helps identify CHRONO as a circadian clock  
600 component. *PLoS Biol* **12**, e1001840, doi:10.1371/journal.pbio.1001840 (2014).
- 601 60 Sharma, A., Wai, C. M., Ming, R. & Yu, Q. Diurnal Cycling Transcription Factors of  
602 Pineapple Revealed by Genome-Wide Annotation and Global Transcriptomic Analysis.  
603 *Genome Biol Evol* **9**, 2170-2190, doi:10.1093/gbe/evx161 (2017).
- 604 61 de Lichtenberg, U. *et al.* Comparison of computational methods for the identification of  
605 cell cycle-regulated genes. *Bioinformatics* **21**, 1164-1171,  
606 doi:10.1093/bioinformatics/bti093 (2005).
- 607 62 Hughes, M. E., Hogenesch, J. B. & Kornacker, K. JTK\_CYCLE: an efficient  
608 nonparametric algorithm for detecting rhythmic components in genome-scale data sets. *J*  
609 *Biol Rhythms* **25**, 372-380, doi:10.1177/0748730410379711 (2010).

- 610 63 Mizuno, T. *et al.* Ambient temperature signal feeds into the circadian clock  
611 transcriptional circuitry through the EC night-time repressor in *Arabidopsis thaliana*.  
612 *Plant Cell Physiol* **55**, 958-976, doi:10.1093/pcp/pcu030 (2014).
- 613 64 Helfer, A. *et al.* LUX ARRHYTHMO encodes a nighttime repressor of circadian gene  
614 expression in the *Arabidopsis* core clock. *Curr Biol* **21**, 126-133,  
615 doi:10.1016/j.cub.2010.12.021 (2011).
- 616 65 Goodstein, D. M. *et al.* Phytozome: a comparative platform for green plant genomics.  
617 *Nucleic Acids Res* **40**, D1178-1186, doi:10.1093/nar/gkr944 (2012).
- 618 66 Bindea, G. *et al.* ClueGO: a Cytoscape plug-in to decipher functionally grouped gene  
619 ontology and pathway annotation networks. *Bioinformatics* **25**, 1091-1093,  
620 doi:10.1093/bioinformatics/btp101 (2009).
- 621 67 Holm, S. A Simple Sequentially Rejective Multiple Test Procedure. *Scandinavian*  
622 *Journal of Statistics* **6**, 65-70 (1979).
- 623



624 **Table 1. Candidate core clock transcription factors in *Kalanchoë fedtschenkoi*.**

625 “Kafe shift” is the number of h the *K. fedtschenkoi* gene expression profile shifted from its *A. thaliana* ortholog’s gene expression  
 626 profile. The shift was calculated by subtracting the phases calls of each ortholog. “Spear shift” is the Spearman rank correlation  
 627 coefficient between orthologs after shifting the *K. fedtschenkoi* gene expression profile by the “Kafe shift”.

628

| Kafe Gene ID    | Kafe Phase Call | Arth Ortholog ID | Arth Gene Symbol | Arth Gene Desc.                                                 | Arth Phase Call | Kafe Shift (hrs) | Spear Shift |
|-----------------|-----------------|------------------|------------------|-----------------------------------------------------------------|-----------------|------------------|-------------|
| Kaladp0748s0043 | 6               | AT5G41410        | BEL1             | POX (plant homeobox) family protein                             | 12              | -6               | 0.97        |
| Kaladp0007s0017 | 14              | AT2G46510        | JAM1             | ABA-inducible BHLH-type transcription factor                    | 12              | +2               | 0.91        |
| Kaladp0007s0017 | 14              | AT1G01260        | JAM2             | basic helix-loop-helix (bHLH) DNA-binding superfamily protein   | 8               | +6               | 0.83        |
| Kaladp0011s1342 | 22              | AT2G42380        | BZIP34           | Basic-leucine zipper (bZIP) transcription factor family protein | 4               | -8               | 0.96        |
| Kaladp0011s1342 | 22              | AT3G58120        | BZIP61           | Basic-leucine zipper (bZIP) transcription factor family protein | 8               | -8               | 0.97        |
| Kaladp1154s0002 | 22              | AT3G47500        | CDF3             | cycling DOF factor 3                                            | 2               | -4               | 0.97        |
| Kaladp1154s0002 | 22              | AT5G62430        | CDF1             | cycling DOF factor 1                                            | 24              | -2               | 0.97        |
| Kaladp1154s0002 | 22              | AT5G39660        | CDF2             | cycling DOF factor 2                                            | 24              | -2               | 0.87        |
| Kaladp0674s0030 | 6               | AT5G63160        | BT1              | BTB and TAZ domain protein 1                                    |                 |                  |             |
| Kaladp0674s0030 | 6               | AT3G48360        | BT2              | BTB and TAZ domain protein 2                                    | 20              | +10              | 0.94        |
| Kaladp0878s0025 | 8               | AT1G07050        |                  | CCT motif family protein                                        | 12              | -2               | 0.92        |
| Kaladp0009s0042 | 22              |                  |                  |                                                                 |                 |                  |             |

629

630

This manuscript has been authored by UT-Battelle, LLC under Contract No. DE-AC05-00OR22725 with the U.S. Department of Energy. The United States Government retains and the publisher, by accepting the article for publication, acknowledges that the United States Government retains a non-exclusive, paid-up, irrevocable, world-wide license to publish or reproduce the published form of this manuscript, or allow others to do so, for United States Government purposes. The Department of Energy will provide public access to these results of federally sponsored research in accordance with the DOE Public Access Plan (<http://energy.gov/downloads/doe-public-access-plan>).

631 **Table 2. Clock-controlled stomata-related genes with rescheduled gene expression from different studies.**

632 “Relationship” refers to the type of transcriptional regulation. “Stomata-related” refers to if the gene is either known as a stomata-  
 633 related gene via publication in the literature (known), is annotated as a stomata-related (GO), or was identified in Moseley et al. 2018b  
 634 as being stomata-related (New).

635

| Clock TF               | Relationship | Study                | Target          | Stomata-related | Gene Description                                                           |
|------------------------|--------------|----------------------|-----------------|-----------------|----------------------------------------------------------------------------|
| Kaladp0748s0043        | Represses    | Yang et al. 2017     | Kaladp0059s0048 | New             | aquaporin pip1-2                                                           |
| Kaladp0748s0043        | Represses    | Moseley et al. 2018b | Kaladp0062s0167 | New             | receptor-like protein kinase haiku2                                        |
| Kaladp0007s0017        | Activates    | Yang et al. 2017     | Kaladp0011s0363 | New             | trehalose-phosphate synthase                                               |
| Kaladp0007s0017        | Activates    | Moseley et al. 2018b | Kaladp0092s0084 | Known/GO        | calcium-dependent protein kinase 26                                        |
| Kaladp0011s1342        | Represses    | Yang et al. 2017     | Kaladp0040s0264 | New             | btb poz domain-containing protein npy2-like                                |
| Kaladp0011s1342        | Represses    | Yang et al. 2017     | Kaladp0008s0539 | New             | mitogen-activated protein kinase                                           |
| Kaladp0011s1342        | Represses    | Yang et al. 2017     | Kaladp0033s0113 | Known/GO        | phototropin-2                                                              |
| Kaladp0011s1342        | Represses    | Moseley et al. 2018b | Kaladp0001s0016 | New             | catalase isozyme 1                                                         |
| Kaladp0011s1342        | Represses    | Moseley et al. 2018b | Kaladp0093s0030 | New             | <sup>36</sup> homeobox-leucine zipper protein anthocyaninless 2 isoform x1 |
| Kaladp0059s0037 (ELF4) | Represses    | Moseley et al. 2018b | Kaladp0062s0076 | New             | 3-ketoacyl- synthase 19-like                                               |
| Kaladp0047s0123 (LNK1) | Activates    | Moseley et al. 2018b | Kaladp0008s0414 | New             | cyclic nucleotide-gated ion channel 15                                     |
| Kaladp0060s0264 (LNK2) | Activates    | Moseley et al. 2018b | Kaladp0024s0371 | New             | pectin lyase-like superfamily protein isoform 1                            |
| Kaladp0099s0129 (LNK2) | Activates    | Moseley et al. 2018b | Kaladp0042s0353 | Known           | abscisic acid receptor pyl8-like                                           |
| Kaladp0060s0264 (LNK2) | Activates    | Moseley et al. 2018b | Kaladp0095s0634 | GO              | mitogen-activated protein kinase homolog mmk2                              |
| Kaladp0101s0041 (PRR7) | Represses    | Moseley et al. 2018b | Kaladp0092s0115 | New             | pleiotropic drug resistance protein 1-like                                 |
| Kaladp0055s0349 (RVE6) | Activates    | Moseley et al. 2018b | Kaladp0043s0103 | New             | phospholipid-transporting atpase 3                                         |
| Kaladp0055s0349 (RVE6) | Activates    | Moseley et al. 2018b | Kaladp0090s0003 | New             | receptor-like protein kinase                                               |

636

637

## 638 10 Figure Legends

### 639 **Figure 1. Models for circadian clock-related alterations of physiology at the molecular** 640 **level.**

641 (A) The core clock generates waves of transcription that propagate into connected (clock-  
642 regulated) gene regulatory networks (GRNs) (B) GRNs can be rewired to different core clock  
643 genes (C) Core clock genes can be rewired within the core clock network, carrying the GRNs  
644 they are connected to with them. Red circles are core clock genes. Green circles are clock-  
645 regulated genes. White and black bars indicate daytime (12-hour) and nighttime (12-hour),  
646 respectively.

### 647 **Figure 2. Several candidate core clock transcription factors are predicted to regulate and** 648 **be regulated by known core clock transcription factors.**

649 Orange ovals represent candidate core clock transcription factors predicted to regulate and be  
650 regulated by known core clock transcription factors. Purple ovals represent known clock  
651 transcription factors. Blue ovals represent candidate core clock transcription factors that are  
652 predicted to only be regulated by known core clock transcription factors. Edges with a green  
653 arrow represent activation of gene expression. Edges with red lines represent repression of gene  
654 expression.

### 655 **Figure 3. Seven candidate core clock transcription factors are predicted to play a role in** 656 **the core clock network of *Kalanchoë fedtschenkoi***

657 (A) Predicted regulatory relationships between candidate core clock transcription factors and  
658 known core clock genes via the Local Edge Machine. Blue line is the probability that any known  
659 core clock transcription factor regulates a candidate clock transcription factor. Orange line is the  
660 probability that a candidate core clock transcription factor regulates any known core clock  
661 transcription factor. Grey circle is the probability of a regulatory relationship. (B) The seven  
662 candidate core clock transcription factors and their relationship with the core clock network in *K.*  
663 *fedtschenkoi*. Blue ovals represent core clock genes and red ovals represent candidate clock  
664 transcription factors. The numbers arrayed at the bottom of the image indicate the number of  
665 hours passed after first light. Green dotted lines represent activation of transcription and black  
666 dotted lines represent repression of transcription. White and black bars indicate daytime (12-  
667 hour) and nighttime (12-hour), respectively. EC: Evening complex, CTF1: Kaladp0748s0043,  
668 CTF2: Kaladp0007s0017, CTF3: Kaladp0011s1342, CTF4: Kaladp1154s0002, CTF5:  
669 Kaladp0674s0030, CTF6: Kaladp0878s0025, CTF7: Kaladp0009s0042.

### 670 **Figure 4. *Kalanchoë fedtschenkoi* core clock transcription factors and stomata-related** 671 **genes regulatory network.**

This manuscript has been authored by UT-Battelle, LLC under Contract No. DE-AC05-00OR22725 with the U.S. Department of Energy. The United States Government retains and the publisher, by accepting the article for publication, acknowledges that the United States Government retains a non-exclusive, paid-up, irrevocable, world-wide license to publish or reproduce the published form of this manuscript, or allow others to do so, for United States Government purposes. The Department of Energy will provide public access to these results of federally sponsored research in accordance with the DOE Public Access Plan (<http://energy.gov/downloads/doe-public-access-plan>).

672 Orange ovals represent candidate core clock transcription factors predicted to regulate and be  
673 regulated by known core clock transcription factors. Purple ovals represent known clock  
674 transcription factors. Blue ovals represent stomata-related genes. Edges with a green arrow  
675 represent activation of gene expression. Edges with red lines represent repression of gene  
676 expression.

677 **Figure 5. Gene expression profiles of *Kalanchoë fedtschenkoi* known and candidate core**  
678 **clock transcription factors and phase calls of their respective targets.**

679 **a)** *Kalanchoë fedtschenkoi* known core clock genes. **b)** *Kalanchoë fedtschenkoi* candidate core  
680 clock genes. The black lines represent the z-score standardized expression profile of the  
681 respective gene. Red and green bars represent the number of predicted target genes phases to the  
682 same time of day. Red bars signify that the target genes are repressed by the respective regulator  
683 and green bars signify that the target genes are activated by the respective regulator. White and  
684 black bars indicate daytime (12-hour) and nighttime (12-hour), respectively.

685 **Figure 6. Enriched functional groups within of clock-regulated stomata-related genes in**  
686 ***Kalanchoë fedtschenkoi*.**

687 Enriched functional groups were determined in the Cytoscape application. ClueGO. Parameters  
688 used in ClueGO are described in the Materials and Methods section.



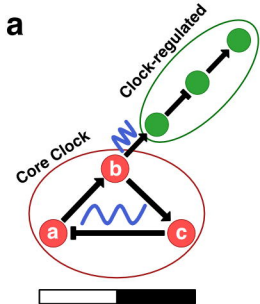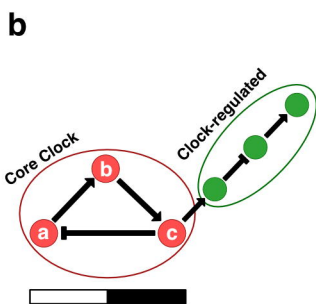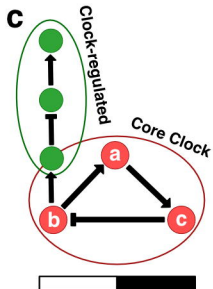

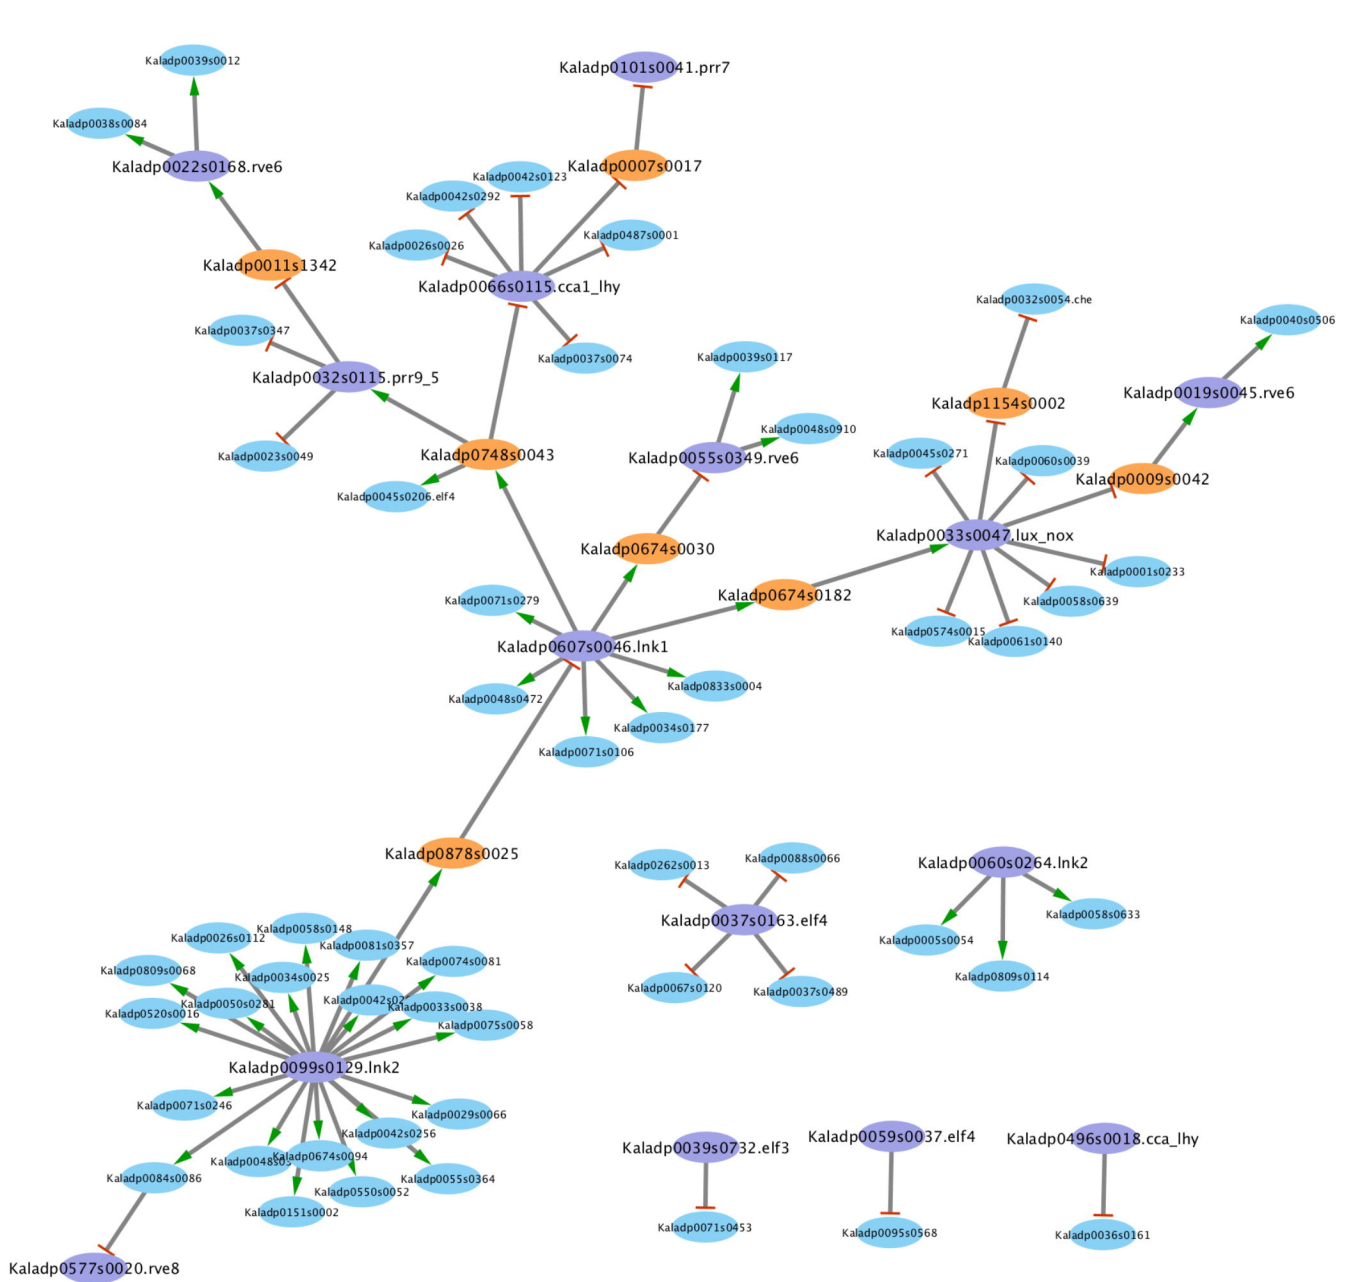

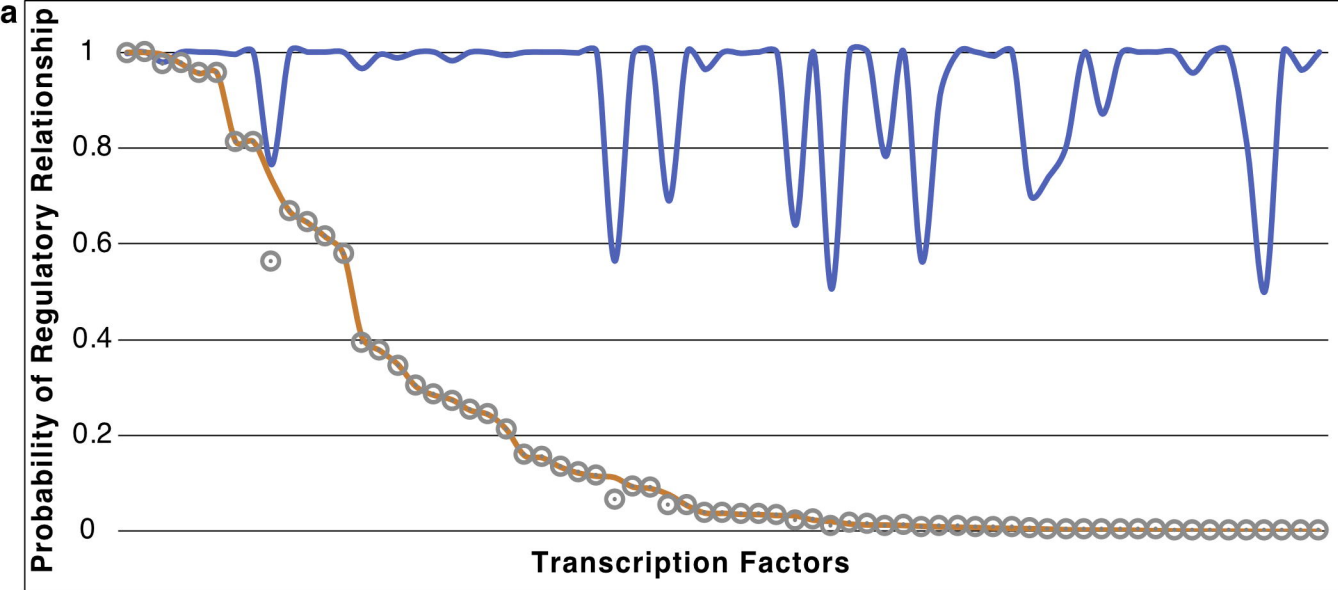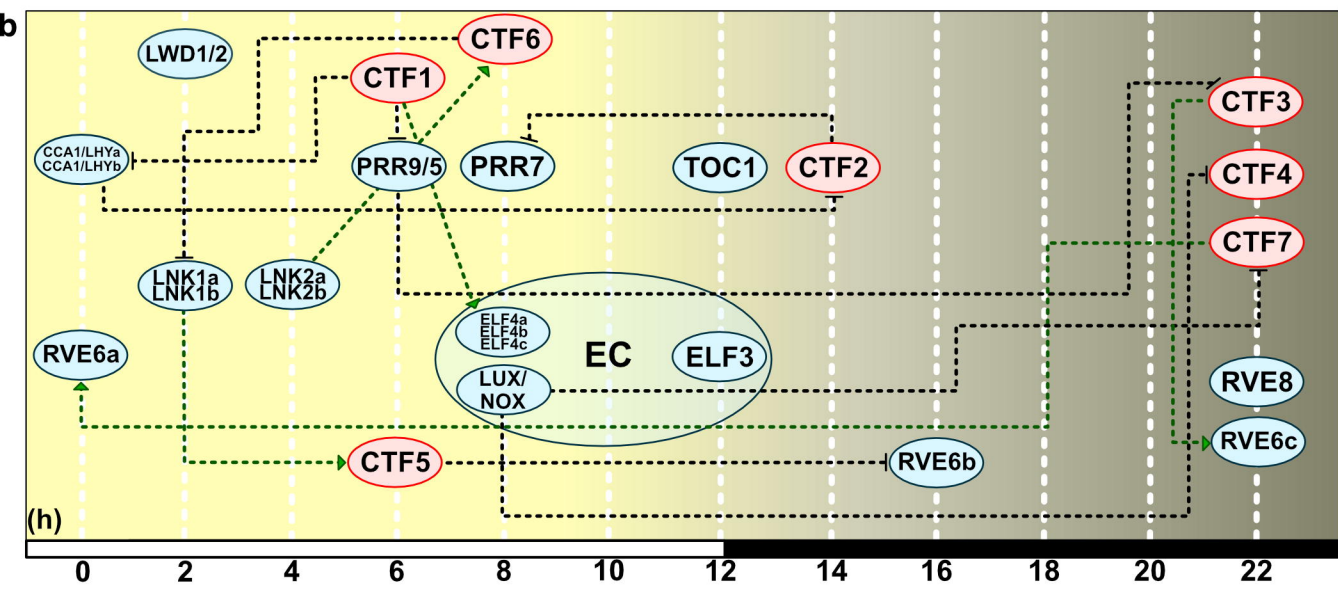

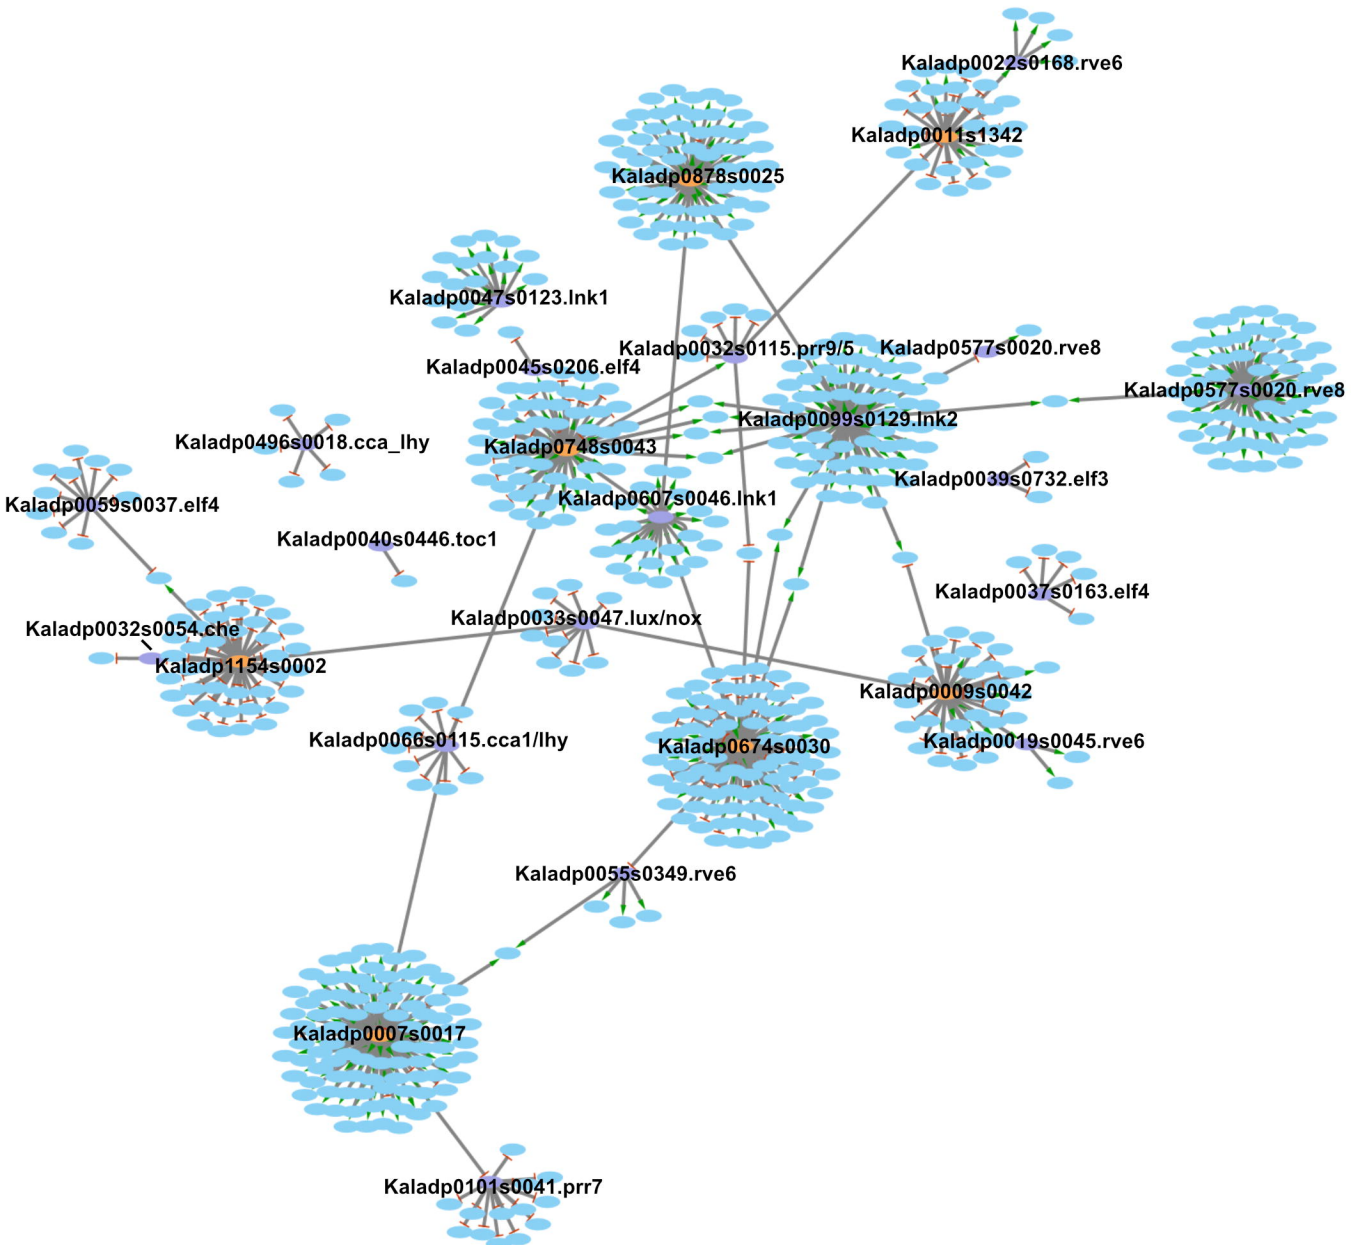



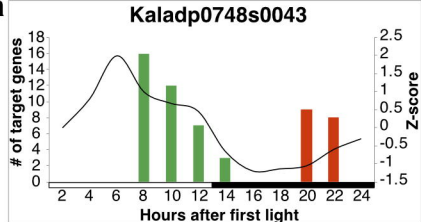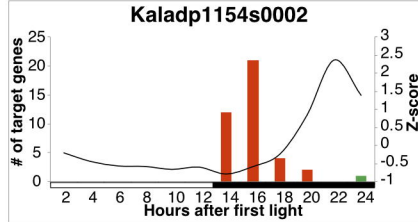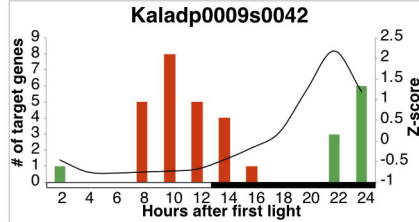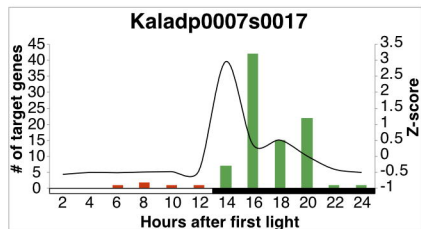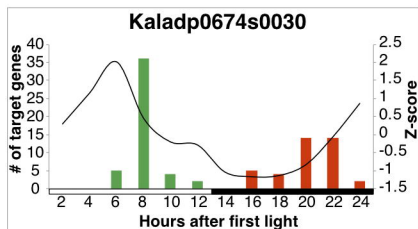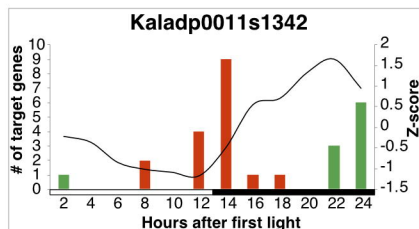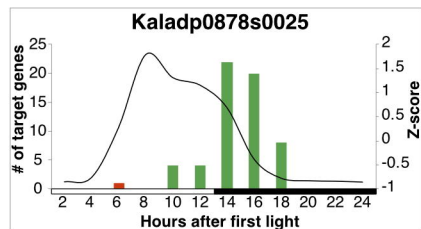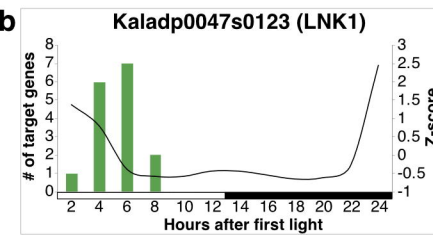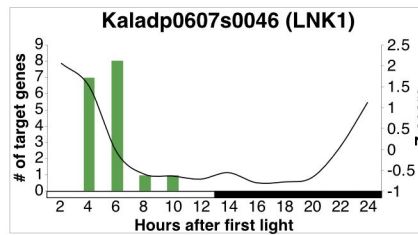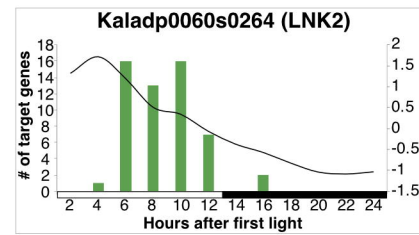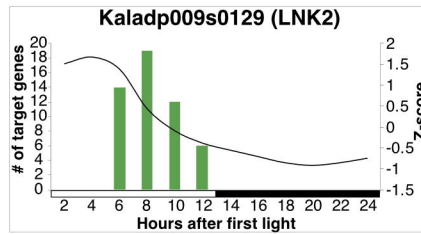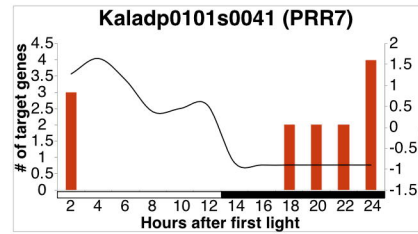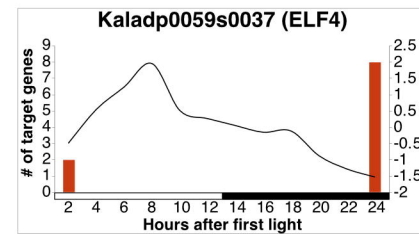

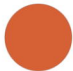

signal transduction

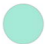

signal  
transduction by  
protein  
phosphorylation

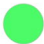

polysaccharide  
catabolic process

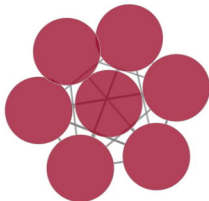

protein  
phosphorylation

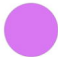

peptidyl-tyrosine  
phosphorylation

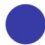

negative  
regulation of  
molecular  
function

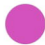

protein  
dephosphorylation

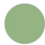

phosphorelay  
signal  
transduction  
system
